# Supplementary material for: An iron stable isotope comparison between human erythrocytes and plasma
Source: Royal Society of Chemistry journal article supplement (doi:10.1039/c4mt00124a), 2014-01-01
Supplement: c4mt00124a1.pdf [file c4mt00124a1.pdf]

Online Supplement to: An iron stable isotope comparison between human erythrocytes and plasma

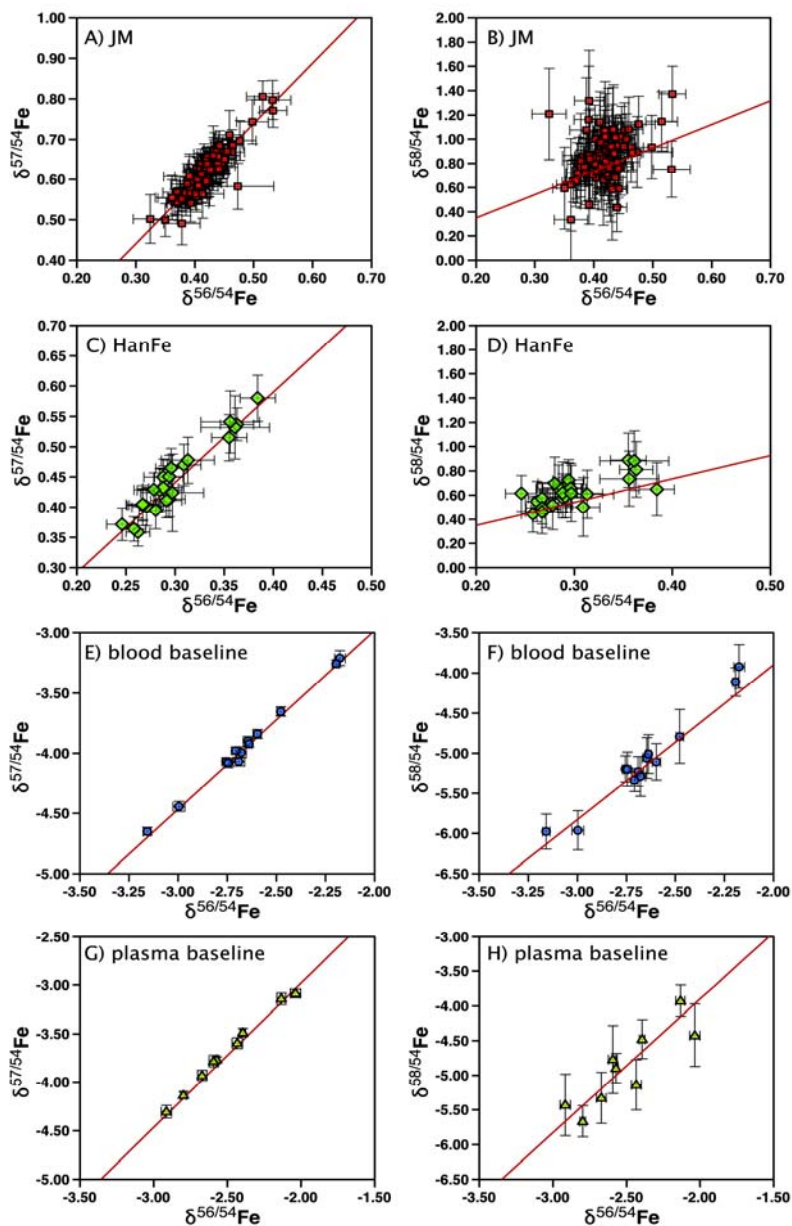

**Figure S1:**  $\delta^{57}\text{Fe}$  versus  $\delta^{56}\text{Fe}$  and  $\delta^{58}\text{Fe}$  versus  $\delta^{56}\text{Fe}$ , respectively, of internal standard materials "JM" (a) and (b); of internal standard material "HanFe" (c) and (d); of baseline blood samples (e) and (f); of baseline plasma samples (g) and (h).
