# Supplementary material for: An iron stable isotope comparison between human erythrocytes and plasma
Source: Royal Society of Chemistry journal article supplement (doi:10.1039/c4mt00124a), 2014-01-01
Supplement: c4mt00124a2.pdf [file c4mt00124a2.pdf]

## Online Supplement to: An iron stable isotope comparison between human erythrocytes and plasma

**Table S1: Compilation of iron isotope ratio measurements of the internal laboratory iron standards “JM” and “HanFe” relative to the “IRMM-014” iron reference material.**

|                              | $\delta^{56}\text{Fe}/^{54}\text{Fe}$<br>(‰) | $\delta^{57}\text{Fe}/^{54}\text{Fe}$<br>(‰) | $\delta^{58}\text{Fe}/^{54}\text{Fe}$<br>(‰) | $\delta^{58}\text{Fe}/^{56}\text{Fe}$<br>(‰) |
|------------------------------|----------------------------------------------|----------------------------------------------|----------------------------------------------|----------------------------------------------|
| <b>JM Iron</b>               |                                              |                                              |                                              |                                              |
| Average value                | 0.419                                        | 0.618                                        | 0.864                                        | 0.445                                        |
| Error (2·σ)                  | 0.071                                        | 0.113                                        | 0.36                                         | 0.342                                        |
| Number of analyses           | 96                                           | 96                                           | 96                                           | 96                                           |
| <b>HanFe Iron - Hannover</b> |                                              |                                              |                                              |                                              |
| Average value                | 0.298                                        | 0.444                                        | 0.629                                        | 0.330                                        |
| Error (2·σ)                  | 0.074                                        | 0.117                                        | 0.24                                         | 0.195                                        |
| Number of analyses           | 25                                           | 25                                           | 25                                           | 25                                           |
| <b>HanFe Iron - Potsdam</b>  |                                              |                                              |                                              |                                              |
| Average value                | 0.287                                        | 0.422                                        | n.d.                                         | n.d.                                         |
| Error (2·σ)                  | 0.067                                        | 0.097                                        | n.d.                                         | n.d.                                         |
| Number of analyses           | 176                                          | 176                                          |                                              |                                              |

n.d. The  $^{58}\text{Fe}/^{54}\text{Fe}$  ratio  
was not determined at GFZ  
Potsdam
